# Supplementary material for: Expression of Activated PIK3CA in Ovarian Surface Epithelium Results in Hyperplasia but Not Tumor Formation
Source: PubMed Central journal article supplement (PMC2629728; doi:10.1371/journal.pone.0004295), 2009-01-27

Figure S1

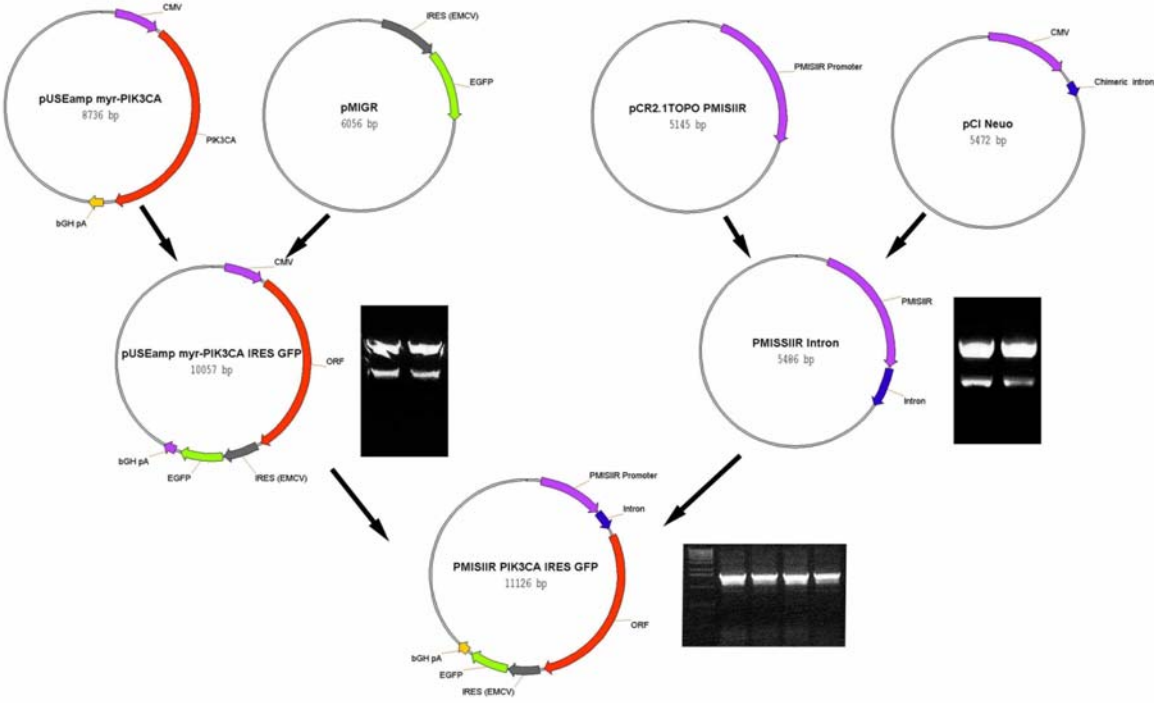

Supplement: pone.0004295.s001.pdf [file pone.0004295.s001.pdf]
